# Supplementary material for: Hydrological Coupling and Decoupling of Hydric Hemiboreal Forest Sites Inferred from Soil Water Models and Tree-Ring Chronology
Source: MDPI journal article supplement (doi:10.3390/f14091734), 2023-08-27
Supplement: s1 [file s1]

## Correlation coefficients between residual tree ring chronology and meteorological and modelled variables

Supplementary materials for the article: Kalvāns, Dauškāne: Coupling and decoupling of hydrological regime at hydric hemiboreal forest sites inferred from soil water model and tree ring chronology

**Table S1.** Model performance metric (msd – mean signed difference; rmse – root mean squared error; rsq – r-square) for model instances with given groundwater exfiltration rate (SeepIn) and active proportion of the leaf area (kLAI) and respective observed parameters (h\_10cm, h\_30cm and h\_60cm – water potential respectively at 10, 30 and 60 cm depth; h\_240cm groundwater head at 240 cm depth; h\_60cm water potential at 60cm depth; theta\_10cm and theta\_60c – volumetric soil water content at respectively 10 cm and 60 cm depth).

| Site   | SeepIn<br>(cm day-1) | Parameter | Metric | kLAI    |      |      | Unit |
|--------|----------------------|-----------|--------|---------|------|------|------|
|        |                      |           |        | 0.5     | 0.75 | 1    |      |
| Plot_1 | 0                    | h_10cm    | msd    | 1500    | 1500 | 1600 | cm   |
| Plot_1 | 0.01                 | h_10cm    | msd    | 1500    | 1500 | 1600 | cm   |
| Plot_1 | 0.03                 | h_10cm    | msd    | 54      | 1500 | 1600 | cm   |
| Plot_1 | 0.05                 | h_10cm    | msd    | -240    | -230 | 1600 | cm   |
| Plot_1 | 0                    | h_10cm    | rmse   | 2700    | 2800 | 2800 | cm   |
| Plot_1 | 0.01                 | h_10cm    | rmse   | 2700    | 2800 | 2800 | cm   |
| Plot_1 | 0.03                 | h_10cm    | rmse   | 340     | 2800 | 2800 | cm   |
| Plot_1 | 0.05                 | h_10cm    | rmse   | 290     | 280  | 2800 | cm   |
| Plot_1 | 0                    | h_10cm    | rsq    | 0.13    | 0.13 | 0.12 | -    |
| Plot_1 | 0.01                 | h_10cm    | rsq    | 0.13    | 0.13 | 0.12 | -    |
| Plot_1 | 0.03                 | h_10cm    | rsq    | 0.00068 | 0.13 | 0.12 | -    |
| Plot_1 | 0.05                 | h_10cm    | rsq    | 0.42    | 0.38 | 0.12 | -    |
| Plot_1 | 0                    | h_240cm   | msd    | 240     | 280  | 310  | cm   |
| Plot_1 | 0.01                 | h_240cm   | msd    | 190     | 230  | 270  | cm   |
| Plot_1 | 0.03                 | h_240cm   | msd    | 49      | 150  | 200  | cm   |
| Plot_1 | 0.05                 | h_240cm   | msd    | -17     | -4.7 | 140  | cm   |
| Plot_1 | 0                    | h_240cm   | rmse   | 250     | 280  | 320  | cm   |
| Plot_1 | 0.01                 | h_240cm   | rmse   | 200     | 240  | 270  | cm   |
| Plot_1 | 0.03                 | h_240cm   | rmse   | 74      | 170  | 210  | cm   |

|        |      |            |      |        |        |         |                                  |
|--------|------|------------|------|--------|--------|---------|----------------------------------|
| Plot_1 | 0.05 | h_240cm    | rmse | 29     | 18     | 160     | cm                               |
| Plot_1 | 0    | h_240cm    | rsq  | 0.021  | 0.0089 | 0.014   | -                                |
| Plot_1 | 0.01 | h_240cm    | rsq  | 0.057  | 0.029  | 0.018   | -                                |
| Plot_1 | 0.03 | h_240cm    | rsq  | 0.29   | 0.11   | 0.081   | -                                |
| Plot_1 | 0.05 | h_240cm    | rsq  | 0.84   | 0.76   | 0.15    | -                                |
| Plot_1 | 0    | h_60cm     | msd  | 4800   | 4800   | 4800    | cm                               |
| Plot_1 | 0.01 | h_60cm     | msd  | 4800   | 4800   | 4800    | cm                               |
| Plot_1 | 0.03 | h_60cm     | msd  | 29     | 4800   | 4800    | cm                               |
| Plot_1 | 0.05 | h_60cm     | msd  | -210   | -150   | 4800    | cm                               |
| Plot_1 | 0    | h_60cm     | rmse | 4800   | 4800   | 4800    | cm                               |
| Plot_1 | 0.01 | h_60cm     | rmse | 4800   | 4800   | 4800    | cm                               |
| Plot_1 | 0.03 | h_60cm     | rmse | 88     | 4800   | 4800    | cm                               |
| Plot_1 | 0.05 | h_60cm     | rmse | 240    | 190    | 4800    | cm                               |
| Plot_1 | 0    | h_60cm     | rsq  | 0.15   | 0.0089 | 0.0077  | -                                |
| Plot_1 | 0.01 | h_60cm     | rsq  | 0.18   | 0.011  | 0.013   | -                                |
| Plot_1 | 0.03 | h_60cm     | rsq  | 0.89   | 0.18   | 0.00041 | -                                |
| Plot_1 | 0.05 | h_60cm     | rsq  | 0.0033 | 0.13   | 0.021   | -                                |
| Plot_1 | 0    | theta_10cm | msd  | 0.079  | 0.089  | 0.1     | cm <sup>3</sup> cm <sup>-3</sup> |
| Plot_1 | 0.01 | theta_10cm | msd  | 0.07   | 0.089  | 0.1     | cm <sup>3</sup> cm <sup>-3</sup> |
| Plot_1 | 0.03 | theta_10cm | msd  | -0.073 | 0.067  | 0.1     | cm <sup>3</sup> cm <sup>-3</sup> |
| Plot_1 | 0.05 | theta_10cm | msd  | -0.3   | -0.22  | 0.081   | cm <sup>3</sup> cm <sup>-3</sup> |
| Plot_1 | 0    | theta_10cm | rmse | 0.094  | 0.1    | 0.12    | cm <sup>3</sup> cm <sup>-3</sup> |
| Plot_1 | 0.01 | theta_10cm | rmse | 0.087  | 0.1    | 0.12    | cm <sup>3</sup> cm <sup>-3</sup> |
| Plot_1 | 0.03 | theta_10cm | rmse | 0.17   | 0.09   | 0.11    | cm <sup>3</sup> cm <sup>-3</sup> |
| Plot_1 | 0.05 | theta_10cm | rmse | 0.31   | 0.26   | 0.1     | cm <sup>3</sup> cm <sup>-3</sup> |
| Plot_1 | 0    | theta_10cm | rsq  | 0.33   | 0.35   | 0.32    | -                                |
| Plot_1 | 0.01 | theta_10cm | rsq  | 0.35   | 0.34   | 0.32    | -                                |
| Plot_1 | 0.03 | theta_10cm | rsq  | 0.19   | 0.32   | 0.34    | -                                |
| Plot_1 | 0.05 | theta_10cm | rsq  | 0.87   | 0.4    | 0.34    | -                                |
| Plot_1 | 0    | theta_30cm | msd  | 0.03   | 0.035  | 0.041   | cm <sup>3</sup> cm <sup>-3</sup> |
| Plot_1 | 0.01 | theta_30cm | msd  | 0.026  | 0.034  | 0.041   | cm <sup>3</sup> cm <sup>-3</sup> |
| Plot_1 | 0.03 | theta_30cm | msd  | -0.018 | 0.023  | 0.041   | cm <sup>3</sup> cm <sup>-3</sup> |

|        |      |            |      |         |         |       |                                  |
|--------|------|------------|------|---------|---------|-------|----------------------------------|
| Plot_1 | 0.05 | theta_30cm | msd  | -0.059  | -0.047  | 0.03  | cm <sup>3</sup> cm <sup>-3</sup> |
| Plot_1 | 0    | theta_30cm | rmse | 0.036   | 0.041   | 0.047 | cm <sup>3</sup> cm <sup>-3</sup> |
| Plot_1 | 0.01 | theta_30cm | rmse | 0.033   | 0.04    | 0.047 | cm <sup>3</sup> cm <sup>-3</sup> |
| Plot_1 | 0.03 | theta_30cm | rmse | 0.041   | 0.039   | 0.046 | cm <sup>3</sup> cm <sup>-3</sup> |
| Plot_1 | 0.05 | theta_30cm | rmse | 0.059   | 0.052   | 0.043 | cm <sup>3</sup> cm <sup>-3</sup> |
| Plot_1 | 0    | theta_30cm | rsq  | 0.41    | 0.38    | 0.34  | -                                |
| Plot_1 | 0.01 | theta_30cm | rsq  | 0.39    | 0.38    | 0.34  | -                                |
| Plot_1 | 0.03 | theta_30cm | rsq  | 0.31    | 0.26    | 0.35  | -                                |
| Plot_1 | 0.05 | theta_30cm | rsq  | 0.86    | 0.46    | 0.27  | -                                |
| Plot_1 | 0    | theta_60cm | msd  | 0.066   | 0.075   | 0.082 | cm <sup>3</sup> cm <sup>-3</sup> |
| Plot_1 | 0.01 | theta_60cm | msd  | 0.055   | 0.072   | 0.081 | cm <sup>3</sup> cm <sup>-3</sup> |
| Plot_1 | 0.03 | theta_60cm | msd  | 0.016   | 0.057   | 0.075 | cm <sup>3</sup> cm <sup>-3</sup> |
| Plot_1 | 0.05 | theta_60cm | msd  | -0.0057 | -0.0041 | 0.059 | cm <sup>3</sup> cm <sup>-3</sup> |
| Plot_1 | 0    | theta_60cm | rmse | 0.071   | 0.08    | 0.087 | cm <sup>3</sup> cm <sup>-3</sup> |
| Plot_1 | 0.01 | theta_60cm | rmse | 0.067   | 0.077   | 0.086 | cm <sup>3</sup> cm <sup>-3</sup> |
| Plot_1 | 0.03 | theta_60cm | rmse | 0.03    | 0.07    | 0.082 | cm <sup>3</sup> cm <sup>-3</sup> |
| Plot_1 | 0.05 | theta_60cm | rmse | 0.019   | 0.012   | 0.074 | cm <sup>3</sup> cm <sup>-3</sup> |
| Plot_1 | 0    | theta_60cm | rsq  | 0.18    | 0.12    | 0.091 | -                                |
| Plot_1 | 0.01 | theta_60cm | rsq  | 0.14    | 0.13    | 0.091 | -                                |
| Plot_1 | 0.03 | theta_60cm | rsq  | 0.31    | 0.11    | 0.092 | -                                |
| Plot_1 | 0.05 | theta_60cm | rsq  | 0.23    | 0.88    | 0.09  | -                                |
| Plot_3 | 0    | h_240cm    | msd  | 170     | 280     | 450   | cm                               |
| Plot_3 | 0.01 | h_240cm    | msd  | 120     | 230     | 300   | cm                               |
| Plot_3 | 0.03 | h_240cm    | msd  | 24      | 160     | 230   | cm                               |
| Plot_3 | 0.05 | h_240cm    | msd  | -13     | 75      | 190   | cm                               |
| Plot_3 | 0    | h_240cm    | rmse | 170     | 280     | 460   | cm                               |
| Plot_3 | 0.01 | h_240cm    | rmse | 120     | 230     | 300   | cm                               |
| Plot_3 | 0.03 | h_240cm    | rmse | 31      | 160     | 230   | cm                               |
| Plot_3 | 0.05 | h_240cm    | rmse | 42      | 78      | 200   | cm                               |
| Plot_3 | 0    | h_240cm    | rsq  | 0.17    | 0.22    | 0.3   | -                                |
| Plot_3 | 0.01 | h_240cm    | rsq  | 0.57    | 0.16    | 0.034 | -                                |
| Plot_3 | 0.03 | h_240cm    | rsq  | 0.83    | 0.23    | 0.15  | -                                |

|        |      |            |      |       |        |        |                                  |
|--------|------|------------|------|-------|--------|--------|----------------------------------|
| Plot_3 | 0.05 | h_240cm    | rsq  | 0.46  | 0.72   | 0.39   | -                                |
| Plot_3 | 0    | theta_30cm | msd  | -0.1  | -0.083 | -0.061 | cm <sup>3</sup> cm <sup>-3</sup> |
| Plot_3 | 0.01 | theta_30cm | msd  | -0.11 | -0.083 | -0.062 | cm <sup>3</sup> cm <sup>-3</sup> |
| Plot_3 | 0.03 | theta_30cm | msd  | -0.24 | -0.089 | -0.064 | cm <sup>3</sup> cm <sup>-3</sup> |
| Plot_3 | 0.05 | theta_30cm | msd  | -0.26 | -0.15  | -0.064 | cm <sup>3</sup> cm <sup>-3</sup> |
| Plot_3 | 0    | theta_30cm | rmse | 0.13  | 0.11   | 0.097  | cm <sup>3</sup> cm <sup>-3</sup> |
| Plot_3 | 0.01 | theta_30cm | rmse | 0.14  | 0.11   | 0.097  | cm <sup>3</sup> cm <sup>-3</sup> |
| Plot_3 | 0.03 | theta_30cm | rmse | 0.24  | 0.12   | 0.097  | cm <sup>3</sup> cm <sup>-3</sup> |
| Plot_3 | 0.05 | theta_30cm | rmse | 0.26  | 0.16   | 0.097  | cm <sup>3</sup> cm <sup>-3</sup> |
| Plot_3 | 0    | theta_30cm | rsq  | 0.2   | 0.39   | 0.42   | -                                |
| Plot_3 | 0.01 | theta_30cm | rsq  | 0.3   | 0.39   | 0.44   | -                                |
| Plot_3 | 0.03 | theta_30cm | rsq  | 0.75  | 0.36   | 0.47   | -                                |
| Plot_3 | 0.05 | theta_30cm | rsq  | 0.93  | 0.66   | 0.48   | -                                |
| Plot_3 | 0    | theta_60cm | msd  | 0.22  | 0.27   | 0.29   | cm <sup>3</sup> cm <sup>-3</sup> |
| Plot_3 | 0.01 | theta_60cm | msd  | 0.18  | 0.27   | 0.29   | cm <sup>3</sup> cm <sup>-3</sup> |
| Plot_3 | 0.03 | theta_60cm | msd  | 0.065 | 0.25   | 0.29   | cm <sup>3</sup> cm <sup>-3</sup> |
| Plot_3 | 0.05 | theta_60cm | msd  | 0.052 | 0.12   | 0.29   | cm <sup>3</sup> cm <sup>-3</sup> |
| Plot_3 | 0    | theta_60cm | rmse | 0.22  | 0.27   | 0.3    | cm <sup>3</sup> cm <sup>-3</sup> |
| Plot_3 | 0.01 | theta_60cm | rmse | 0.18  | 0.27   | 0.3    | cm <sup>3</sup> cm <sup>-3</sup> |
| Plot_3 | 0.03 | theta_60cm | rmse | 0.073 | 0.25   | 0.29   | cm <sup>3</sup> cm <sup>-3</sup> |
| Plot_3 | 0.05 | theta_60cm | rmse | 0.057 | 0.13   | 0.29   | cm <sup>3</sup> cm <sup>-3</sup> |
| Plot_3 | 0    | theta_60cm | rsq  | 0.9   | 0.8    | 0.59   | -                                |
| Plot_3 | 0.01 | theta_60cm | rsq  | 0.84  | 0.8    | 0.61   | -                                |
| Plot_3 | 0.03 | theta_60cm | rsq  | 0.86  | 0.84   | 0.63   | -                                |
| Plot_3 | 0.05 | theta_60cm | rsq  | 0.91  | 0.55   | 0.64   | -                                |

**Table S2.** Pearson correlation coefficients of the meteorological parameters and residual tree ring chronology: Wind – wind speed km/day; Temp – air temperature (C); Rad – solar radiation (MJ/m2/day), Prec – precipitation (cm) ; M – May; MJ – May-June; MJJ – May-July; MJJA – May-August; JJA – June-August; JA – July-August; A – August.

| Study site | Season | Prec  | Rad   | Temp  | Wind  |
|------------|--------|-------|-------|-------|-------|
| Plot_1     | M      | -0.11 | 0.28  | 0.18  | -0.04 |
|            | MJ     | 0.00  | 0.15  | 0.01  | 0.01  |
|            | MJJ    | 0.25  | -0.14 | -0.09 | 0.2   |
|            | MJJA   | 0.12  | -0.07 | -0.07 | 0.05  |
|            | JJA    | 0.18  | -0.23 | -0.18 | 0.09  |
|            | JA     | 0.16  | -0.24 | -0.12 | 0.05  |
|            | A      | -0.16 | 0.13  | 0.03  | -0.21 |
| Plot_3     | M      | 0.06  | 0.2   | 0.27  | -0.15 |
|            | MJ     | 0.23  | 0.21  | 0.26  | -0.4* |
|            | MJJ    | 0.37* | 0.15  | 0.32  | -0.3  |
|            | MJJA   | 0.33  | 0.19  | 0.4*  | -0.33 |
|            | JJA    | 0.33  | 0.1   | 0.35* | -0.34 |
|            | JA     | 0.25  | 0.05  | 0.38* | -0.17 |
|            | A      | 0.07  | 0.12  | 0.42* | -0.25 |

\* significant at 0.05 level

\*\* significant at 0.01 level

**Table S3.** Pearson correlation coefficients between modelled soil water parameters and residual tree ring chronology: GWdepth – mean depth to groundwater (cm); rangeGWdepth – difference between maximal minimal GWdepth (cm); vRoot – modelled mean actual root water uptake (cm/day); vRoot\_rRoot – ration between modelled mean actual and potential root water uptake; M – May; MJ – May-June; MJJ – May-July; MJJA – May-August; JJA – June-August; JA – July-August; A – August. Missing data are model instances where at more than 20 years depth to groundwater (GWdepth) was not estimated as the water potential at 240 cm depth was negative.

| Study site | GW exfiltration (cm day <sup>-1</sup> ) | kLAI                       | 0.4      |                |       |             | 0.5      |          |                |       | 0.7      |                |        |             |
|------------|-----------------------------------------|----------------------------|----------|----------------|-------|-------------|----------|----------|----------------|-------|----------|----------------|--------|-------------|
|            |                                         | Modeled parameter / Season | GWde pth | range GWde pth | vRoot | vRoot_rRoot | GWde pth | GWde pth | range GWde pth | vRoot | GWde pth | range GWde pth | vRoot  | vRoot_rRoot |
| Plot_1     | 0.00                                    | M                          | 0.04     | NA             | 0.40* | 0.27        | 0.19     | NA       | 0.48**         | 0.30  | 0.28     | NA             | 0.55** | 0.36*       |

| Study site | GW exfiltration (cm day <sup>-1</sup> ) | kLAI                       | 0.4      |                |       |             | 0.5      |          |                |       | 0.7      |                |        |             |
|------------|-----------------------------------------|----------------------------|----------|----------------|-------|-------------|----------|----------|----------------|-------|----------|----------------|--------|-------------|
|            |                                         | Modeled parameter / Season | GWde pth | range GWde pth | vRoot | vRoot_rRoot | GWde pth | GWde pth | range GWde pth | vRoot | GWde pth | range GWde pth | vRoot  | vRoot_rRoot |
|            |                                         |                            |          |                |       |             |          |          |                |       |          |                |        |             |
|            |                                         | MJ                         | 0.11     | NA             | 0.30  | 0.31        | 0.52**   | NA       | 0.45**         | 0.40* | 0.25     | NA             | 0.40*  | 0.27        |
|            |                                         | MJJ                        | 0.38*    | NA             | 0.12  | 0.18        | 0.42*    | NA       | 0.34           | 0.41* | NA       | NA             | 0.35*  | 0.38*       |
|            |                                         | MJJA                       | 0.16     | NA             | 0.05  | 0.11        | 0.33     | NA       | 0.35*          | 0.42* | NA       | NA             | 0.37*  | 0.39*       |
|            |                                         | JJA                        | 0.13     | NA             | -0.01 | 0.10        | 0.31     | NA       | 0.28           | 0.42* | NA       | NA             | 0.17   | 0.30        |
|            |                                         | JA                         | 0.06     | NA             | -0.14 | -0.02       | 0.25     | NA       | 0.13           | 0.34  | NA       | NA             | 0.15   | 0.33        |
|            |                                         | A                          | -0.02    | NA             | -0.13 | -0.09       | 0.16     | NA       | 0.17           | 0.26  | NA       | NA             | 0.10   | 0.20        |
|            |                                         |                            |          |                |       |             |          |          |                |       |          |                |        |             |
| Plot_1     | 0.01                                    | M                          | 0.06     | 0.21           | 0.36* | 0.22        | 0.06     | 0.39*    | 0.41*          | 0.28  | 0.11     | NA             | 0.51** | 0.29        |
|            |                                         | MJ                         | 0.10     | 0.33           | 0.26  | 0.27        | 0.15     | 0.43*    | 0.36*          | 0.35* | 0.38*    | NA             | 0.45** | 0.33        |
|            |                                         | MJJ                        | 0.37*    | 0.12           | 0.11  | 0.17        | 0.33     | 0.10     | 0.16           | 0.23  | NA       | NA             | 0.38*  | 0.40*       |
|            |                                         | MJJA                       | 0.26     | -0.01          | 0.05  | 0.10        | -0.12    | 0.02     | 0.11           | 0.18  | NA       | NA             | 0.39*  | 0.41*       |
|            |                                         | JJA                        | 0.23     | -0.04          | 0.00  | 0.10        | -0.15    | -0.07    | 0.05           | 0.17  | NA       | NA             | 0.24   | 0.37*       |
|            |                                         | JA                         | 0.18     | -0.21          | -0.11 | 0.00        | -0.19    | NA       | -0.10          | 0.06  | NA       | NA             | 0.12   | 0.31        |
|            |                                         | A                          | 0.10     | NA             | -0.11 | -0.07       | -0.22    | NA       | -0.06          | 0.01  | NA       | NA             | 0.10   | 0.18        |
| Plot_1     | 0.01                                    | M                          | 0.05     | -0.07          | 0.26  | 0.13        | 0.05     | 0.01     | 0.33           | 0.20  | 0.05     | 0.42*          | 0.42*  | 0.26        |
|            |                                         | MJ                         | 0.01     | 0.08           | 0.17  | 0.19        | 0.09     | 0.25     | 0.27           | 0.27  | 0.17     | 0.41*          | 0.40*  | 0.37*       |
|            |                                         | MJJ                        | -0.01    | 0.03           | 0.06  | 0.10        | 0.10     | 0.11     | 0.14           | 0.19  | 0.41*    | 0.28           | 0.32   | 0.37*       |
|            |                                         | MJJA                       | -0.04    | -0.03          | 0.01  | 0.04        | 0.25     | 0.01     | 0.07           | 0.13  | 0.28     | 0.25           | 0.32   | 0.37*       |
|            |                                         | JJA                        | -0.05    | -0.01          | -0.03 | 0.05        | 0.23     | 0.00     | 0.03           | 0.13  | 0.27     | 0.14           | 0.27   | 0.38*       |
|            |                                         | JA                         | -0.05    | -0.04          | -0.10 | -0.02       | 0.18     | -0.15    | -0.09          | 0.02  | 0.23     | -0.05          | 0.15   | 0.31        |
|            |                                         | A                          | -0.07    | -0.13          | -0.13 | -0.10       | 0.10     | -0.20    | -0.13          | -0.07 | 0.18     | NA             | 0.18   | 0.24        |
| Plot_1     | 0.05                                    | M                          | 0.12     | 0.30           | 0.34  | 0.18        | 0.03     | 0.01     | 0.26           | 0.11  | 0.01     | -0.02          | 0.31   | 0.18        |
|            |                                         | MJ                         | 0.07     | 0.04           | 0.10  | 0.10        | -0.02    | 0.02     | 0.15           | 0.16  | 0.10     | 0.28           | 0.33   | 0.33        |
|            |                                         | MJJ                        | -0.05    | -0.07          | -0.05 | -0.04       | -0.04    | -0.01    | 0.05           | 0.09  | 0.12     | 0.15           | 0.21   | 0.26        |
|            |                                         | MJJA                       | -0.11    | -0.10          | -0.11 | -0.11       | -0.06    | -0.03    | 0.01           | 0.05  | 0.29     | 0.06           | 0.16   | 0.22        |

| Study site | GW exfiltration (cm day <sup>-1</sup> ) | kLAI                       | 0.4      |                |       |             | 0.5      |          |                |       | 0.7      |                |       |             |
|------------|-----------------------------------------|----------------------------|----------|----------------|-------|-------------|----------|----------|----------------|-------|----------|----------------|-------|-------------|
|            |                                         | Modeled parameter / Season | GWde pth | range GWde pth | vRoot | vRoot_rRoot | GWde pth | GWde pth | range GWde pth | vRoot | GWde pth | range GWde pth | vRoot | vRoot_rRoot |
|            |                                         | JJA                        | -0.12    | -0.11          | -0.15 | -0.11       | -0.07    | -0.01    | -0.02          | 0.06  | 0.27     | 0.07           | 0.13  | 0.23        |
|            |                                         | JA                         | -0.14    | -0.09          | -0.21 | -0.18       | -0.07    | -0.01    | -0.08          | 0.01  | 0.22     | -0.12          | -0.01 | 0.12        |
|            |                                         | A                          | -0.15    | -0.09          | -0.22 | -0.22       | -0.08    | 0.05     | -0.09          | -0.04 | 0.14     | NA             | -0.02 | 0.04        |
| Plot_3     | 0.00                                    | M                          | -0.17    | 0.18           | 0.07  | -0.22       | -0.05    | NA       | 0.18           | -0.06 | NA       | NA             | 0.24  | 0.15        |
|            |                                         | MJ                         | -0.12    | 0.24           | 0.02  | -0.16       | -0.06    | NA       | 0.11           | -0.07 | NA       | NA             | 0.26  | 0.10        |
|            |                                         | MJJ                        | -0.11    | 0.09           | -0.05 | -0.16       | -0.09    | NA       | -0.02          | -0.23 | NA       | NA             | 0.29  | 0.14        |
|            |                                         | MJJA                       | -0.12    | -0.01          | -0.03 | -0.16       | -0.19    | NA       | 0.01           | -0.24 | NA       | NA             | 0.33  | 0.15        |
|            |                                         | JJA                        | -0.10    | -0.12          | -0.06 | -0.13       | -0.21    | NA       | -0.05          | -0.25 | NA       | NA             | 0.25  | 0.14        |
|            |                                         | JA                         | -0.11    | -0.12          | -0.07 | -0.09       | -0.24    | NA       | -0.09          | -0.25 | NA       | NA             | 0.18  | 0.10        |
|            |                                         | A                          | -0.15    | 0.07           | 0.03  | -0.07       | -0.26    | NA       | 0.07           | -0.11 | NA       | NA             | 0.20  | 0.14        |
| Plot_3     | 0.01                                    | M                          | -0.16    | 0.19           | 0.07  | -0.17       | -0.18    | NA       | 0.13           | -0.09 | NA       | NA             | 0.24  | 0.27        |
|            |                                         | MJ                         | -0.10    | 0.23           | 0.05  | -0.10       | -0.16    | NA       | 0.08           | -0.08 | NA       | NA             | 0.25  | 0.09        |
|            |                                         | MJJ                        | -0.08    | 0.10           | -0.02 | -0.08       | -0.18    | NA       | -0.04          | -0.24 | NA       | NA             | 0.27  | 0.11        |
|            |                                         | MJJA                       | -0.11    | -0.01          | -0.01 | -0.10       | -0.14    | NA       | -0.02          | -0.28 | NA       | NA             | 0.32  | 0.12        |
|            |                                         | JJA                        | -0.09    | -0.12          | -0.03 | -0.07       | -0.14    | NA       | -0.07          | -0.29 | NA       | NA             | 0.24  | 0.11        |
|            |                                         | JA                         | -0.11    | -0.12          | -0.05 | -0.05       | -0.16    | NA       | -0.11          | -0.33 | NA       | NA             | 0.15  | 0.08        |
|            |                                         | A                          | -0.16    | 0.13           | 0.02  | -0.09       | -0.16    | NA       | 0.03           | -0.24 | NA       | NA             | 0.20  | 0.12        |
| Plot_3     | 0.03                                    | M                          | -0.13    | 0.09           | 0.11  | -0.06       | -0.16    | 0.21     | 0.08           | -0.18 | -0.16    | NA             | 0.23  | -0.13       |
|            |                                         | MJ                         | -0.03    | 0.15           | 0.11  | 0.04        | -0.12    | 0.23     | 0.01           | -0.16 | -0.15    | NA             | 0.22  | 0.10        |
|            |                                         | MJJ                        | -0.01    | 0.04           | 0.03  | 0.01        | -0.10    | 0.10     | -0.03          | -0.13 | NA       | NA             | 0.18  | 0.04        |
|            |                                         | MJJA                       | -0.07    | -0.07          | 0.03  | -0.02       | -0.09    | 0.05     | 0.01           | -0.09 | NA       | NA             | 0.26  | 0.10        |
|            |                                         | JJA                        | -0.05    | -0.17          | 0.01  | -0.01       | -0.07    | -0.09    | 0.00           | -0.06 | NA       | NA             | 0.19  | 0.10        |
|            |                                         | JA                         | -0.08    | -0.17          | -0.05 | -0.04       | -0.06    | -0.15    | 0.01           | 0.02  | NA       | NA             | 0.10  | 0.07        |
|            |                                         | A                          | -0.15    | 0.15           | 0.01  | -0.08       | -0.08    | -0.01    | 0.12           | 0.10  | NA       | NA             | 0.21  | 0.15        |
| Plot_3     | 0.05                                    | M                          | -0.07    | 0.13           | 0.13  | 0.01        | -0.11    | 0.15     | 0.11           | -0.06 | -0.09    | 0.26           | 0.23  | 0.08        |
|            |                                         | MJ                         | 0.03     | 0.13           | 0.15  | 0.10        | -0.04    | 0.19     | 0.09           | -0.01 | -0.10    | 0.18           | 0.18  | 0.08        |

| Study site | GW exfiltration (cm day <sup>-1</sup> ) | kLAI                       | 0.4      |                |       |             | 0.5      |          |                |       | 0.7      |                |       |             |
|------------|-----------------------------------------|----------------------------|----------|----------------|-------|-------------|----------|----------|----------------|-------|----------|----------------|-------|-------------|
|            |                                         | Modeled parameter / Season | GWde pth | range GWde pth | vRoot | vRoot_rRoot | GWde pth | GWde pth | range GWde pth | vRoot | GWde pth | range GWde pth | vRoot | vRoot_rRoot |
|            |                                         | MJJ                        | 0.04     | 0.04           | 0.07  | 0.07        | -0.02    | 0.08     | 0.03           | 0.00  | -0.08    | 0.13           | 0.09  | -0.05       |
|            |                                         | MJJA                       | -0.04    | -0.05          | 0.04  | 0.00        | -0.05    | -0.02    | 0.04           | -0.02 | -0.13    | 0.10           | 0.10  | -0.09       |
|            |                                         | JJA                        | -0.03    | -0.14          | 0.02  | 0.01        | -0.03    | -0.17    | 0.02           | 0.00  | -0.17    | 0.09           | 0.03  | -0.10       |
|            |                                         | JA                         | -0.07    | -0.17          | -0.05 | -0.06       | -0.06    | -0.17    | -0.02          | 0.00  | -0.23    | 0.04           | -0.03 | -0.11       |
|            |                                         | A                          | -0.14    | 0.11           | -0.03 | -0.16       | -0.12    | 0.08     | 0.03           | -0.05 | -0.27    | NA             | 0.05  | -0.10       |

\* significant at 0.05 level

\*\* significant at 0.01 level
